# Supplementary material
Source: PubMed Central journal article supplement (PMC6702641)

SUPPLEMENTARY DATA

**Supplementary Table S1.** Association between the IC biomarkers and the risk of CAD in unadjusted, minimally adjusted and final adjusted Cox models.

|                                            | Unadjusted       |                  | Adjusted for Age and HbA1c |              | Final Models*    |              |
|--------------------------------------------|------------------|------------------|----------------------------|--------------|------------------|--------------|
|                                            | HR (95% CI)**    | p-value          | HR (95% CI)**              | p-value      | HR (95% CI)**    | p-value      |
| <b>DCCT Baseline (91 events, n=518)</b>    |                  |                  |                            |              |                  |              |
| AGE-LDL-IC mg/L                            | 1.32 (1.06,1.64) | <b>0.015</b>     | 1.29 (1.03,1.61)           | <b>0.026</b> | 1.21 (0.96,1.52) | 0.111        |
| MDA-LDL-IC mg/L                            | 1.30 (1.05,1.62) | <b>0.016</b>     | 1.32 (1.06,1.64)           | <b>0.014</b> | 1.25 (0.99,1.57) | 0.054        |
| oxLDL-IC mg/L                              | 1.50 (1.15,1.94) | <b>0.002</b>     | 1.48 (1.14,1.90)           | <b>0.003</b> | 1.35 (1.03,1.77) | <b>0.032</b> |
| <b>DCCT Closeout (84 events, n=500)</b>    |                  |                  |                            |              |                  |              |
| AGE-LDL-IC mg/L                            | 1.31 (1.06,1.62) | <b>0.011</b>     | 1.26 (1.02,1.54)           | <b>0.029</b> | 1.04 (0.82,1.32) | 0.757        |
| MDA-LDL-IC mg/L                            | 1.34 (1.07,1.69) | <b>0.011</b>     | 1.34 (1.06,1.69)           | <b>0.014</b> | 1.17 (0.93,1.47) | 0.194        |
| oxLDL-IC mg/L                              | 1.59 (1.23,2.04) | <b>&lt;0.001</b> | 1.49 (1.17,1.91)           | <b>0.001</b> | 1.20 (0.92,1.58) | 0.178        |
| <b>All measurements (91 events, n=518)</b> |                  |                  |                            |              |                  |              |
| AGE-LDL-IC mg/L                            | 1.37 (1.13,1.67) | <b>0.002</b>     | 1.31 (1.06,1.61)           | <b>0.012</b> | 1.17 (0.95,1.45) | 0.139        |
| MDA-LDL-IC mg/L                            | 1.33 (1.07,1.66) | <b>0.010</b>     | 1.32 (1.05,1.66)           | <b>0.019</b> | 1.20 (0.95,1.50) | 0.122        |
| oxLDL-IC mg/L                              | 1.58 (1.26,1.99) | <b>&lt;0.001</b> | 1.49 (1.18,1.87)           | <b>0.001</b> | 1.28 (1.02,1.60) | <b>0.031</b> |

\* Adjusted for age, mean HbA1c, cohort, sex, mean BPS, pulse, (log) triglycerides, mean LDL, (log) AER and duration of T1D

\*\*Per 1 unit increase in the log transformed biomarker value. The hazard ratio per (say) a 25% increase in the biomarker (or equivalently, a 1.25 fold change) is given by  $HR^{\log(1.25)}$ , where “^” denotes the “to the power of”. Biomarkers are noted amount per mg of apolipoprotein B contained in the IC, using serum total ApoB/L

SUPPLEMENTARY DATA

**Supplementary Table S2.** AUC comparisons between various baseline models with and without LDL and OxLDL IC for the four CVD outcomes.

|                | AUC   |       |       |       | Difference in AUC |               |               |
|----------------|-------|-------|-------|-------|-------------------|---------------|---------------|
|                | M0    | M1    | M2    | M3    | M1 vs. M0         | M2 vs. M0     | M3 vs. M1     |
| <b>Any-CVD</b> | 0.688 | 0.704 | 0.701 | 0.713 | -0.011, 0.042     | -0.012, 0.039 | -0.010, 0.028 |
| <b>MACCE</b>   | 0.724 | 0.727 | 0.736 | 0.739 | -0.017, 0.024     | -0.021, 0.045 | -0.019, 0.043 |
| <b>MI</b>      | 0.714 | 0.718 | 0.734 | 0.739 | -0.020, 0.028     | -0.022, 0.061 | -0.019, 0.059 |
| <b>CAD</b>     | 0.676 | 0.694 | 0.695 | 0.707 | -0.011, 0.045     | -0.009, 0.047 | -0.09, 0.035  |

M0 = model adjusted for age, HbA1c, AER, sex, SBP, pulse, duration of T1D, cohort and triglycerides.

M1 = M0 + LDL.

M2 = M0 + OxLDL IC.

M3 = M0 + LDL + OxLDL IC (final model).

SUPPLEMENTARY DATA

**Supplementary Figure S1.** Risk gradients showing the linearity of the log hazard rate for any-CVD (first row), MACCE (second row), CAD (third row) and MI (no strokes) as a function of the log of the three IC biomarkers (columns).

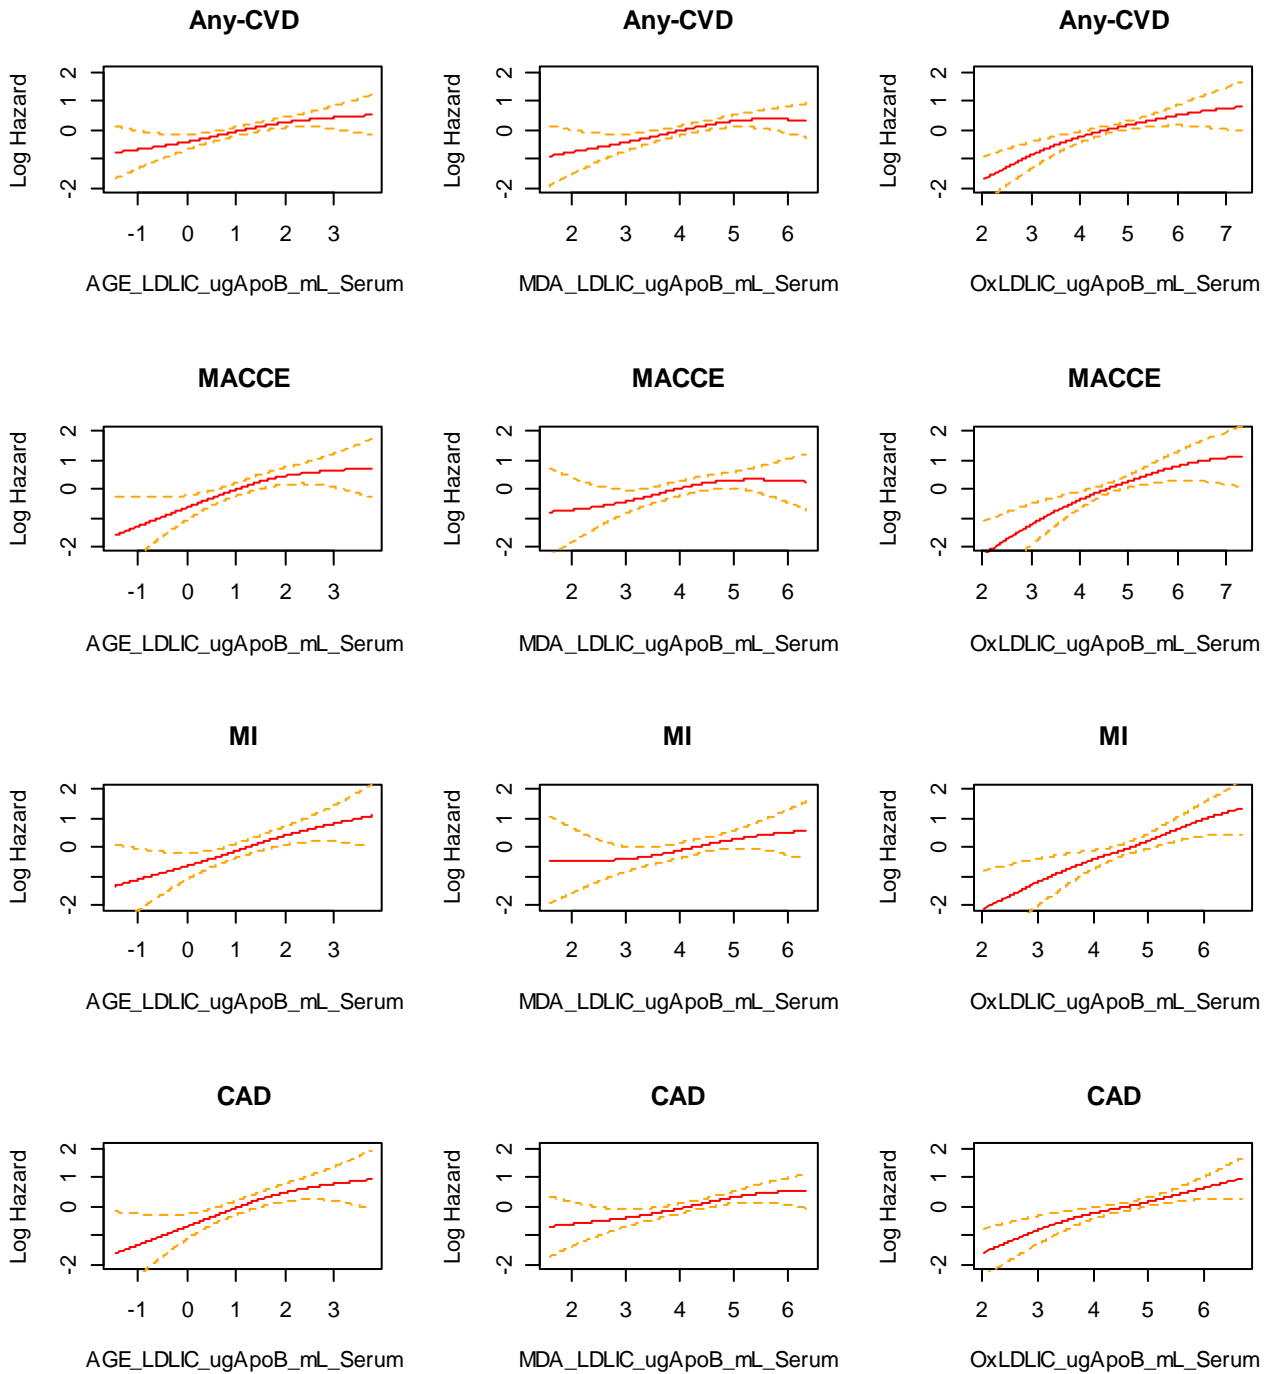

Supplement: DB190358SupplementaryData.pdf [file DB190358SupplementaryData.pdf]
